# Supplementary material
Source: PubMed Central journal article supplement (PMC4463497)
Supplement: ejhg2014205x1.pdf [file ejhg2014205x1.pdf]

## SUPPLEMENTARY DATA

**Supplementary Figure 1:** Genetic screening cascade for craniosynostosis, including the analysis of *FGFR1*, *FGFR2*, *FGFR3*, *TWIST1*, and *EFNB1*. The exons analyzed for each gene at each level are indicated. \*High incidence (19%) of mosaicism which should be taken into account when designing screening method<sup>6</sup>. *FGFR2* exons 7 and 9 are alternatively known as exons 8(IIIa) and exon 10 (IIIc). *FGFR3* exons 7 and 9 are alternatively known as exons 7 (IIIc) and 10 (TM)<sup>161</sup>. Additional screening including the analysis of *TCF12*, *ERF* and the regulatory regions of *IHH*.

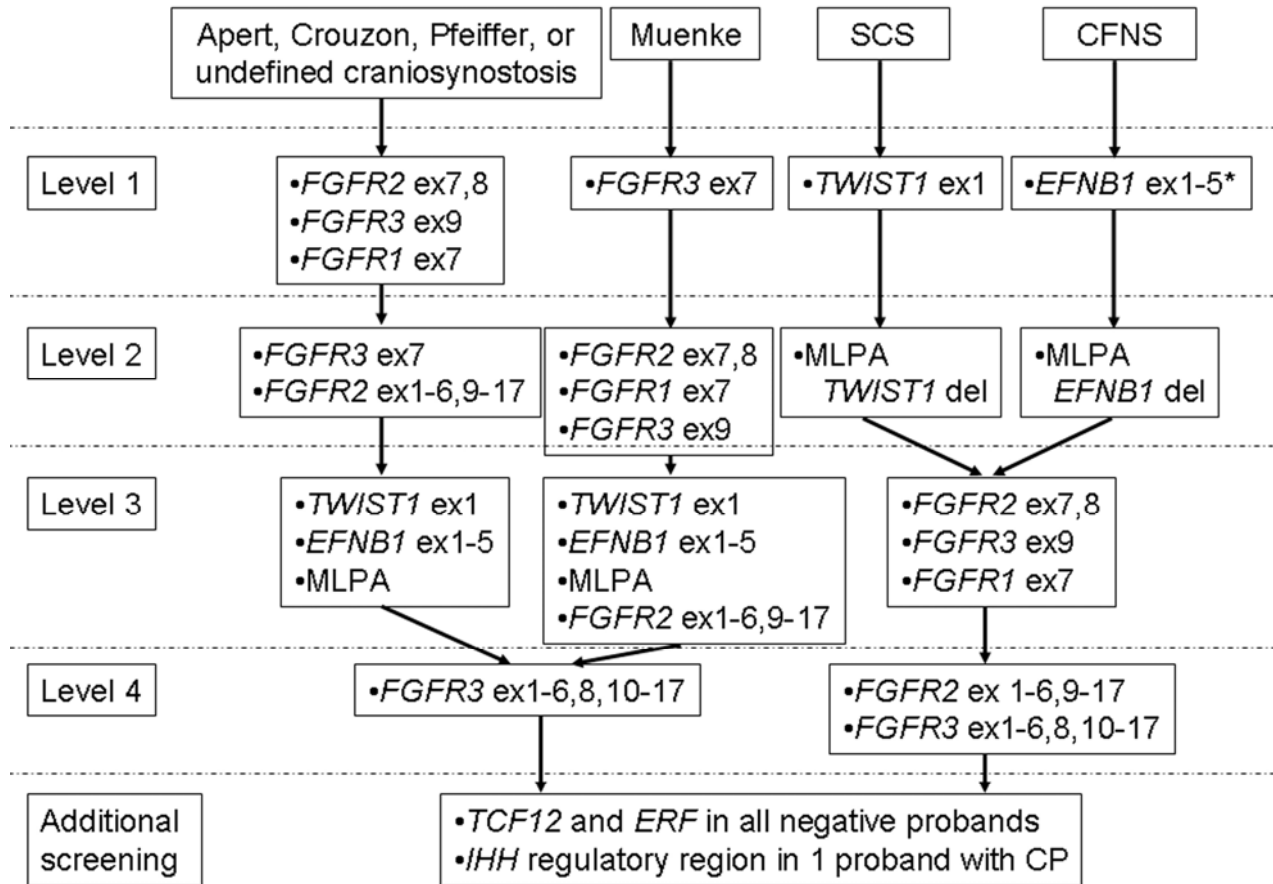

**Supplementary Figure 2. Pedigrees of the five families with *TCF12* mutations.** Family 1 with the c.596dupC (p.Asn200Lysfs\*4) mutation in exon 9. Family 2 with the c.842G>C (p.(Ser281\*)) mutation in exon 11. The mutation had either arisen *de novo* or was due to germ line mosaicism. Family 3 with the exon 11 mutation, c.826-2A>G. The mutation had either arisen *de novo* or was due to germ line mosaicism. Family 4 - It's notable that the proband from this family, not only has the *TCF12* p.(Gln382\*) mutation, but also an 18 bp deletion in *TWIST1*, p.(Gly87\_Gly92del). Cosegregation analysis showed that the proband and unaffected father carried the *TWIST1* deletion. This deletion has also been observed in normal controls, but its pathogenicity is unclear<sup>17</sup>. Thus, it appears that the *TCF12* mutation is the pathogenic mutation in our family and that the *TWIST1* deletion is a non-pathogenic variant. The *TCF12* mutation showed incomplete penetrance whilst the *TWIST1* copy number variant was paternally inherited and did not segregate with the craniosynostosis, thus showing that it is a non-pathogenic CNV. Family 5 with the c.1520T>G (p.(Leu507Arg)) mutation. Two family members reported bilateral cutaneous syndactyly of the second and third toes. The mutation was inherited from the asymptomatic father.

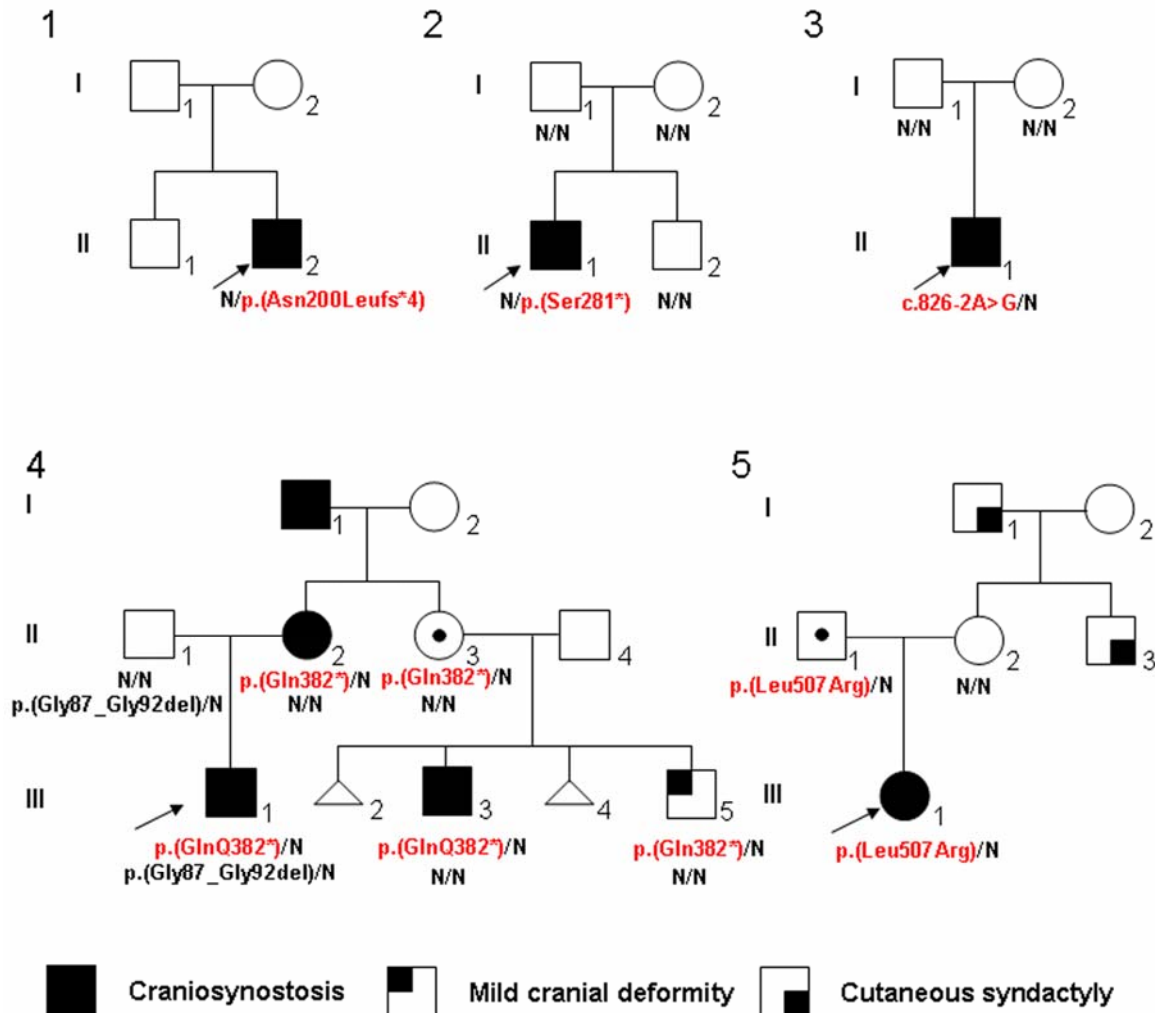

**Supplementary Figure 3: Magnetic resonance images (MRI) reconstruction of the cranial bones of proband 4.** Metopic and bicoronal synostosis (a, b, d, e) and ossification defects in the parietal bones (c, d) are shown for proband 4, with the TCF12 variant p.(Gln382\*).

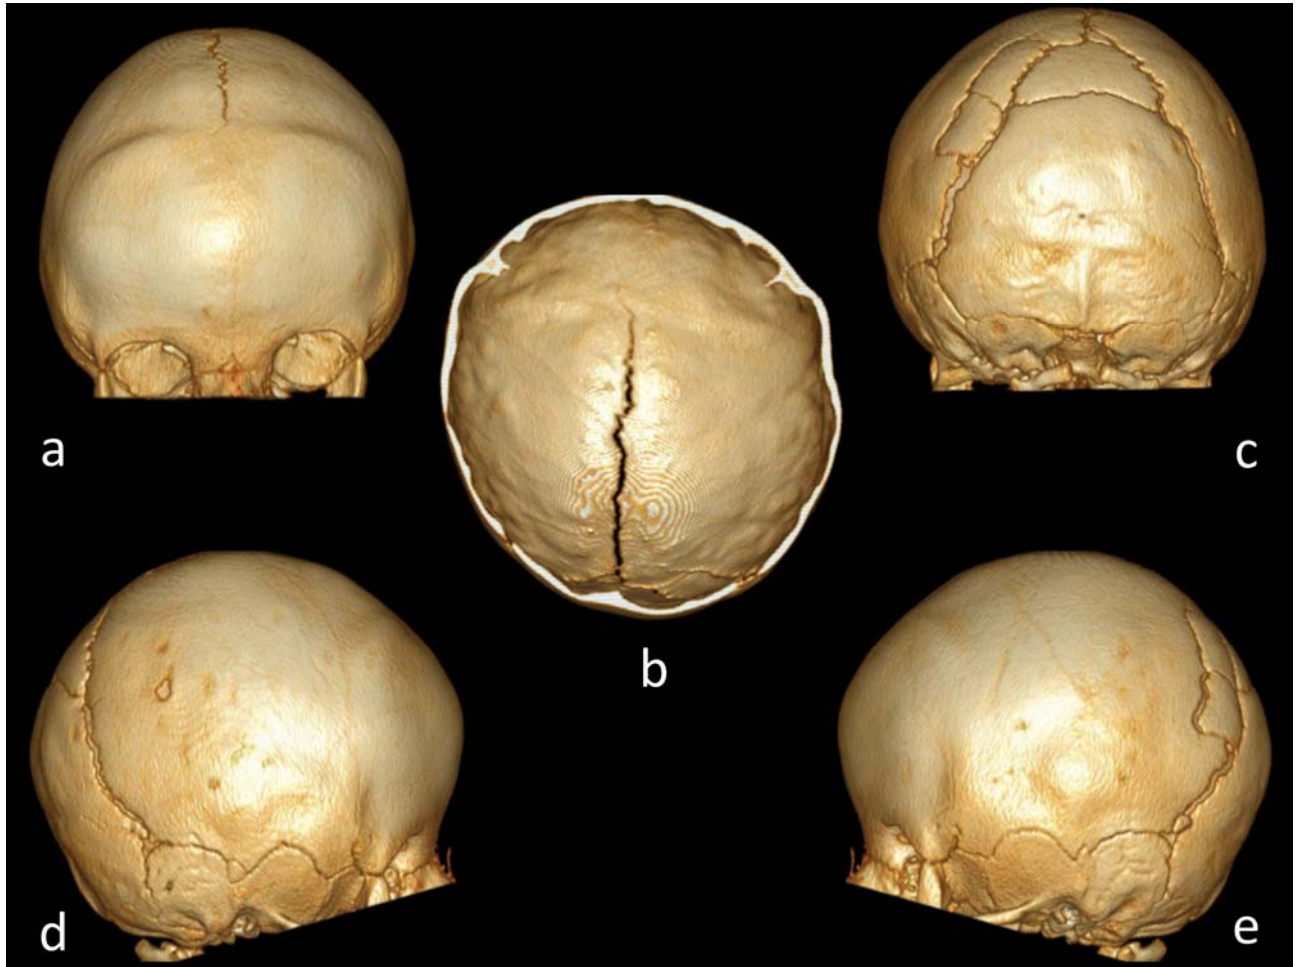

**Supplementary Figure 4: Proposed genetic screening method for classical mutation screening or for NGS bioinformatics analysis.** *FGFR2* exons 7 and 9 are alternatively known as exons 8(IIIa) and exon 10 (IIIc). *FGFR3* exons 7 and 9 are alternatively known as exons 7 (IIIc) and 10 (TM)<sup>16</sup>.

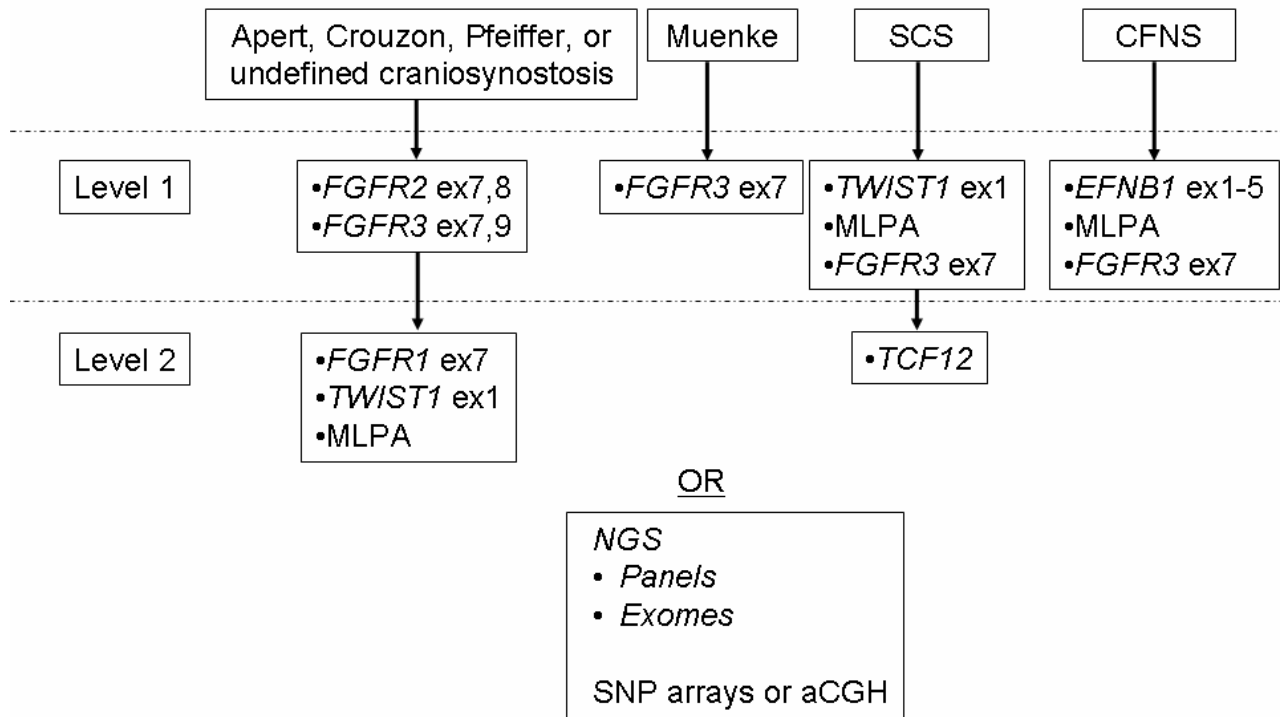

**Supplementary Table 1: Oligonucleotide sequences and PCR conditions for *FGFR1*, *FGFR2*, *FGFR3*, *TWIST1* and *EFNB1*.**

| Gene         | Exon  | Sense oligonucleotide (5'-3') | Antisense oligonucleotide (5'-3') | Size (bp) | Annealing temperature (°C) |
|--------------|-------|-------------------------------|-----------------------------------|-----------|----------------------------|
| <i>FGFR1</i> | 7     | CAACCCATCACTGGGAAAGCCAAG      | TGTGTGCCTGAAGCGTGAGGAATGATC       | 420       | 65 <sup>1</sup>            |
| <i>FGFR2</i> | 2     | CTGACTCGCCAATCTCTTTC          | GGCAAAGGACCTTCTCTCA               | 459       | 60                         |
| <i>FGFR2</i> | 3     | CCTCCACTGACCTTTGTGG           | AAACTATGAAGCTGTATGCCT             | 470       | 59 <sup>1</sup>            |
| <i>FGFR2</i> | 4     | TTTGCAGGGTTCTGGGT             | ATCGGAGCCGGGCAGTTACT              | 217       | 59                         |
| <i>FGFR2</i> | 5     | AAGCTGTCCATCAGTATA            | TGATGTTCTGAAAGCTTA                | 239       | 56                         |
| <i>FGFR2</i> | 6     | ATTCTGTGCTAGGATTGTTA          | AGGACTTAACGTTTCATGCTT             | 255       | 55                         |
| <i>FGFR2</i> | 7     | GGTCTCTCATTCTCCCATCCC         | CCAACAGGAAATCAAAGAACC             | 325       | 59                         |
| <i>FGFR2</i> | 8     | CCTCCACAATCATTCTGTGTC         | CGAAGCTCCAACCCCTAGACCC            | 256       | 55                         |
| <i>FGFR2</i> | 9     | GGTTGTGCTATGATGCGTCA          | TCGCACATGGAAGCTCACAG              | 395       | 60                         |
| <i>FGFR2</i> | 10    | AACCCATTCTTTCTAAGA            | GGCCAAGAGAAGTACTCAC               | 277       | 56                         |
| <i>FGFR2</i> | 11    | ATGCTATGTGCTAATCCC            | ACTTTCTTGATAAGACTC                | 215       | 54                         |
| <i>FGFR2</i> | 12    | TAACAGTAGCTGCCCATGAG          | GGGCGAATGCAGTTT                   | 204       | 53                         |
| <i>FGFR2</i> | 13    | TCCTGGCCTCATGTGA              | CCAGCCAAGTAGAATGTGAA              | 421       | 59                         |
| <i>FGFR2</i> | 14    | CGGCCACACTGTATTTTC            | TGTTACTGCCATCGACTTAC              | 293       | 56                         |
| <i>FGFR2</i> | 15    | CCCTATTGAGCCTGCTAA            | GATAACCGCTTTGTAGTTGC              | 431       | 57                         |
| <i>FGFR2</i> | 16    | GGGAGGAAAGAGCACATAG           | CCAGAGAGCTTCAGCCATT               | 431       | 63                         |
| <i>FGFR2</i> | 17    | TTCGGAGGAACTGGCAGG            | TCCAACCAACAGCCAACAGG              | 383       | 56                         |
| <i>FGFR2</i> | 18    | TGTTATCCTGACCCAAGA            | AGTCCACTGCTCCAGAAA                | 432       | 55 <sup>3</sup>            |
| <i>FGFR3</i> | 2     | CCGGGCCGTGGGGGCAGCAT          | GCGTTGGGGACGGGAACCGGC             | 245       | 69 <sup>2</sup>            |
| <i>FGFR3</i> | 3     | TCCACTGCTGTCTCTGTAAAGGG       | CCCTCCTCTCCACCAATGACC             | 454       | 62 <sup>2</sup>            |
| <i>FGFR3</i> | 4     | GGGGTCTCTCTGGTCATTGGTG        | CCCAGCCCCTCTGTATCCTG              | 366       | 63 <sup>1</sup>            |
| <i>FGFR3</i> | 5     | CACAGGACGGGAAACTGAGG          | GGTGAGTGAGCGGAGGCA                | 350       | 64 <sup>2</sup>            |
| <i>FGFR3</i> | 6     | CCGCCAACACCGTCCGCTTCC         | TGAGCGTCATCTGCCCCACA              | 410       | 67 <sup>1</sup>            |
| <i>FGFR3</i> | 7     | GTGGAGAACAAGTTTGGCAGCATC      | CTGCCCCGAAGCTCCAACCCCTA           | 452       | 63 <sup>1</sup>            |
| <i>FGFR3</i> | 8     | CCTGCCGTGTGGACTCTGTG          | GTGTCCCGAGCCAGCGTC                | 280       | 69 <sup>1</sup>            |
| <i>FGFR3</i> | 9     | GCCCATGTCTTTGCAGCCGAGGA       | GCTCACACAGCCAGGACCAGCGTG          | 300       | 62 <sup>1</sup>            |
| <i>FGFR3</i> | 10    | ACCCCCGGCTGTACCTCC            | CAGTCCCTGCCATACACCCGTCC           | 383       | 62                         |
| <i>FGFR3</i> | 11/12 | GGCTGAGAGTGGGCGAGTTT          | CGGGCTCCTCAGACGGG                 | 439       | 65                         |
| <i>FGFR3</i> | 13    | AGGGCGGTAGGTGCGGTAG           | CCCCTGCTCCAGCATCTC                | 343       | 63                         |
| <i>FGFR3</i> | 14-15 | GGTGGAGAGGCTTCAGCCCT          | AGGGCTGCGCTGCTGCC                 | 459       | 65                         |
| <i>FGFR3</i> | 16    | GGGGCAGCAGCGCAGCCCT           | AGGGCTGCGCTGCTGCC                 | 419       | 68                         |
| <i>FGFR3</i> | 17    | CCAAGTGCACACACGACC            | TCTTCGCACAGCCACCTCTG              | 409       | 65                         |

|               |        |                        |                      |     |                                    |
|---------------|--------|------------------------|----------------------|-----|------------------------------------|
| <i>FGFR3</i>  | 18     | GGTGGCTGTGCGAAGAGGG    | GGGTGGGCTGCTAGGGAC   | 252 | 68                                 |
| <i>TWIST1</i> | 1 (A2) | GGGACTGGAAAGCGGAAACT   | CTGGCTCTTCCTCGCTGTTG | 523 | 61 <sup>2</sup>                    |
| <i>TWIST1</i> | 1 (B2) | CGTGTCCAGCTCGCCAGTCT   | GGGCAGCGTGGGGATGATCT | 406 | 66 <sup>2</sup>                    |
| <i>TWIST1</i> | 1 (C2) | CAGCGGGTCATGGCCAACG    | GCCTGCCGTCTGCCACCT   | 379 | 2-step PCR<br>(76/68) <sup>1</sup> |
| <i>EFNB1</i>  | 1      | CCCCGTCGCGCCTCGTG      | GTGTTTTCTGCGGGCGGGC  | 557 | 66                                 |
| <i>EFNB1</i>  | 2      | GTCCGCTTCCCTGGTTCTGG   | ATTCTCGCCCCAACATTTA  | 542 | 57                                 |
| <i>EFNB1</i>  | 3/4    | TTGGCTGAAGCAGAATGGGAGT | GACTGTTCTTCCCCTTTCC  | 659 | 58 <sup>2</sup>                    |
| <i>EFNB1</i>  | 5      | GGGCTCCCTGGGTGACTCTGAT | CGGACCTCTCCTTTCGCC   | 661 | 61 <sup>2</sup>                    |

*FGFR1* exon 7 (NM\_015850.3 NG\_007729.1), *FGFR2* exons 2-18 (NM\_000141.4, NG\_012449.1), *FGFR3* exons 2-18 (NM\_000142.4, NG\_0126321), *TWIST1* exon 1 (NM\_000474.3, NG\_008114.1) and *EFNB1* exons 1-5 (NM\_004429.4, NG\_008887.1)

The standard HRM PCR cycling conditions was 94 °C 5mins, 40 cycles at 94 °C 40s, annealing temp 40s, 72 °C 1min and a final extension of 8mins at 72 °C. TD- Touchdown PCR, 0.5 °C decrease/cycle for 16 cycles starting at the first indicated temperature, then 24 cycles at the second indicated temperature. Two step PCR of a combined annealing and extension cycle. <sup>1</sup>5% DMSO or <sup>2</sup>10% DMSO added. <sup>3</sup>44 cycles. *TWIST1* exon 1 was divided into three fragments (A2, B2 and C2).

**Supplementary Table 2: Oligonucleotide sequences and PCR conditions for *TCF12*.**

| Exon | Sense oligonucleotide (5'-3') | Antisense oligonucleotide (5'-3') | Size (bp) | Annealing Temp (°C) |
|------|-------------------------------|-----------------------------------|-----------|---------------------|
| 2    | GCGTAATCTTCCCCAGTACC          | CAGATGGAGTTCACGCTGCC              | 308       | TD 66/58            |
| 3    | TAAATGATCGGGTCTTC             | AGATTTCTGAGGGAAGTGTCA             | 475       | 59 <sup>1</sup>     |
| 4a   | GATTGATACTTAGCTCTTCCAC        | AAAAATGGCTAAATACATATGGAG          | 494       | 53                  |
| 4b   | AAGGGGAAAAAGGTATACAT          | TCTGGCTTTATTTAAACCTAACTT          | 309       | 50                  |
| 5    | GAGTGTCATTATGCTCAATTAGCG      | CAAGAAAAGCCCTAGATGC               | 314       | 54                  |
| 6    | TACCATGAATAGTCTAGCAGTTTG      | AATGGAGGTGGGTTATGAA               | 362       | 53                  |
| 7    | ATGGGTGCGTTCTAAGTT            | AAGCATAGCCAGAAGTACAG              | 339       | 55                  |
| 8    | TTTTTCACTGGGACTAGTTA          | ATCGAATGTACCCTTG TAG              | 311       | 50                  |
| 9    | TAAGCCCCTTACAGAATATAGA        | TGCCTAAATAAGGCCTGAATA             | 302       | 50                  |
| 10   | CCCTTGAATTTTTATAAGCA          | TTT TAGAAAGGCATGGTAAA             | 369       | 51                  |
| 11   | TTTACCATGCCTTTCTAAAA          | ATAAAGATATCGGGGTC ACT             | 365       | 51                  |
| 12   | GATGATAGAGAACACCCTT           | ATCAATACAAACCGAGAATA              | 307       | 52                  |
| 13   | ATGATGAAACAGTCTAAA ACTTG      | GGCTCTCTTTACACACTTTCTTATAG        | 371       | 53                  |
| 14   | ATCTTTACCCTTTCCTT CACAAC      | CCCTCATAACACAATTTT AACATCA        | 389       | 56                  |
| 15   | AGCCTTTTCATATCTTAATAAAATAG    | AAAAGCACATGCCAGTAGAGC             | 435       | 53                  |
| 16   | CACTTGCTATCTTCCACATATCACAT    | CCTTCCTTTCAGAAAGATCCTC            | 407       | 56                  |
| 17   | AAAAAGTTGCTGAAATCAGATGAGT     | GGCTCTATTCATCAATAAGTATCTGT        | 443       | 53                  |
| 18   | AGGATATTCACCAGCTAGAAA         | TATATAGTCCCTCAAATGGTATAGTA        | 493       | 51                  |
| 19   | TTGTGCACAATCAGCATATCTTAC      | TGATACAGTAGAAGAAGTACTGGG          | 426       | 53                  |
| 20   | TAGTATGGGAATGAAGTTACACAA      | GGCCACTGCTCACTAGAGA               | 358       | 54                  |

*TCF12* transcript NM\_207037.1. Exon 4 was divided into two overlapping fragments (a, b). <sup>1</sup>Final MgCl<sub>2</sub> concentration 2.5mM and 44 cycles. TD- Touchdown PCR, 0.5°C decrease/cycle for 16 cycles starting at the first indicated temperature, then 24 cycles at the second indicated temperature.

**Supplementary Table 3: Oligonucleotide sequences and PCR conditions for *ERF*.**

| <b>Exon</b> | <b>Sense oligonucleotide (5'-3')</b> | <b>Antisense oligonucleotide (5'-3')</b> | <b>Size (bp)</b> | <b>Annealing Temp (°C)</b> |
|-------------|--------------------------------------|------------------------------------------|------------------|----------------------------|
| 1           | GGGGCGGGCGCAGTGTCT                   | CCCCCAAAGTTTCTCCGTTTCG                   | 333              | 65 <sup>1</sup>            |
| 2           | TTGGCTGAGGTGAGACAGATTTTC             | CCCAAGGTCACACAGCTAGGATT                  | 486              | 64                         |
| 3           | ACCCTCTGGGCACTTGATTTGTC              | AGGGAAGCGGAAGTGGCTAC                     | 410              | 61.7                       |
| 4a          | AAACTGGTGCTGGTCAATTACCC              | CCTCCAGCTCTGACGTGCCATC                   | 353              | 63 <sup>2</sup>            |
| 4b          | TCTTCCCTCTTCTCGGCTGTGGT              | GGGGGCTGAGGTGGTAGTTGTA                   | 478              | 63 <sup>1</sup>            |
| 4c          | CCCACGCTGAGCCCGATGTA                 | CCGAGATGGGCTCCACCTTGATCTG                | 454              | 64 <sup>1</sup>            |
| 4d          | CCGTAGCCGGTGCTGACAAG                 | CAAGAGAGCTGCCCTCACCTCC                   | 559              | 67 <sup>1</sup>            |

*ERF* transcript (NM\_004429.2). Exon 4 was divided into four overlapping fragments (a, b, c, and d). <sup>1</sup>10% DMSO or <sup>2</sup>5% DMSO added.



**Supplementary Table 4: Oligonucleotides for the construction of the *TCF12* minigene vectors.**

| <b>Mutant cDNA<sup>1</sup></b> | <b>Exon /Intron</b> | <b>Sense oligonucleotide (5'-3')</b> | <b>Antisense oligonucleotide (5'-3')</b> | <b>Size (bp)</b> | <b>Annealing Temp (°C)</b> |
|--------------------------------|---------------------|--------------------------------------|------------------------------------------|------------------|----------------------------|
| c.-1 A>G                       | Int 1               | GGAGCTCGAGGCGTAATCTCCCCAGTACC        | GGAGGGATCCCAGATGGAGTTCACGCTGCC           | 382              | 62                         |
| c.826-2 G>A                    | Int 10              | GGGGGAATTCCTTCAAGGCTTACCGCGTTTA      | GGGGCTCGAGATCGGGGTCACTGAAAGTCCA          | 394              | 60                         |

<sup>1</sup>*TCF12* transcript NM\_207037.1.

**Supplementary Table 5: Non-synonymous variants or possibly pathogenic variants identified in *TCF12* in the study, which were subsequently shown to be non-pathogenic.**

| <b>cDNA</b>           | <b>Exon</b> | <b>Amino acid</b> | <b>Pathogenicity exclusion criteria and Frequency in control populations</b>                                                                                                                                                                                                                                                                                                                                                            |
|-----------------------|-------------|-------------------|-----------------------------------------------------------------------------------------------------------------------------------------------------------------------------------------------------------------------------------------------------------------------------------------------------------------------------------------------------------------------------------------------------------------------------------------|
| c.-1G>A <sup>1</sup>  | 2           | N/A               | Patient presented with craniosynostosis and other clinical features. A minigene assay did not reveal that splicing was altered.<br>Subsequently the patient was clinically diagnosed with Mulibrey Nanism (MIM 253250) and a homozygous <i>TRIM37</i> mutation was identified, thus the patient was withdrawn from cohort.<br>The variant was absent from the public databases: EVS and 1000 genomes, and 200 Spanish healthy controls. |
| c.454C>T <sup>1</sup> | 7           | p.(Pro152Ser)     | Failed to segregate with familial craniosynostosis. Found in low frequency in EVS: European Americans 6/8584; African Americans 0/4384.                                                                                                                                                                                                                                                                                                 |
| c.898G>A              | 11          | p.(Gly300Ser)     | EVS: European Americans 285/8584; African Americans 49/4384. Common variant in control population.                                                                                                                                                                                                                                                                                                                                      |

<sup>1</sup>The c.-1G>A and c.454C>T variants have been submitted to the LOVD gene variant database at [www.LOVD.nl/CAV3](http://www.LOVD.nl/CAV3) (patient IDs #00017836 and #00017837, respectively).

**Supplementary Table 6: Details of the craniosynostosis probands (n=20) where the genetic diagnosis differed from the referral diagnosis.**

| Referral diagnosis     | Mutation details                     | Genetic diagnosis | Comments                |
|------------------------|--------------------------------------|-------------------|-------------------------|
| Crouzon                | <i>FGFR3</i> c.749G>C (p.Pro250Arg)  | Muenke            |                         |
| Crouzon                | <i>FGFR3</i> c.749G>C (p.Pro250Arg)  | Muenke            |                         |
| Crouzon                | <i>FGFR3</i> c.749G>C (p.Pro250Arg)  | Muenke            |                         |
| Crouzon                | <i>FGFR3</i> c.749G>C (p.Pro250Arg)  | Muenke            |                         |
| Crouzon                | <i>FGFR3</i> c.749G>C (p.Pro250Arg)  | Muenke            |                         |
| Crouzon                | <i>FGFR3</i> c.749G>C (p.Pro250Arg)  | Muenke            |                         |
| Crouzon                | <i>FGFR3</i> c.749G>C (p.Pro250Arg)  | Muenke            |                         |
| Crouzon                | <i>FGFR3</i> c.749G>C (p.Pro250Arg)  | Muenke            |                         |
| Crouzon                | <i>FGFR3</i> c.749G>C (p.Pro250Arg)  | Muenke            |                         |
| Crouzon                | <i>FGFR3</i> c.749G>C (p.Pro250Arg)  | Muenke            |                         |
| Muenke                 | <i>FGFR2</i> c.1010G>C (p.Ala337Pro) | Crouzon           |                         |
| Pfeiffer               | <i>FGFR2</i> c.1124A>G (p.Tyr375Cys) | BSS               | Prenatal case           |
| Pfeiffer               | <i>TWIST1</i> Deletion Ex1-2         | SCS               |                         |
| Pfeiffer               | <i>FGFR3</i> c.749G>C (p.Pro250Arg)  | Muenke            |                         |
| Pfeiffer               | <i>FGFR2</i> c.1040C>G (p.Ser347Cys) | Crouzon           |                         |
| Pfeiffer               | <i>FGFR3</i> c.1172C>A (p.Ala391Glu) | CSAN              | 5 month old on referral |
| Pfeiffer               | <i>FGFR3</i> c.749G>C (p.Pro250Arg)  | Muenke            |                         |
| Crouzon/Apert/Pfeiffer | <i>FGFR2</i> c.1124A>G (p.Tyr375Cys) | BSS               | Prenatal case           |
| Crouzon/Pfeiffer       | <i>TWIST1</i> Deletion Ex1-2         | SCS               |                         |
| Crouzon/Pfeiffer       | <i>FGFR3</i> c.1172C>A (p.Ala391Glu) | CSAN              | 3 month old on referral |

BSS: Beare Stevenson syndrome; SCS: Saethre-Chotzen syndrome; CSAN: Crouzon syndrome with acanthosis nigricans.

### Supplementary references cited in Table1:

- S1. Muenke M, Gripp KW, McDonald-McGinn DM *et al*: A unique point mutation in the fibroblast growth factor receptor 3 gene (FGFR3) defines a new craniosynostosis syndrome. *Am J Hum Genet* 1997; **60**: 555-564.
- S2. Steinberger D, Vriend G, Mulliken JB, Müller U: The mutations in FGFR2-associated craniosynostoses are clustered in five structural elements of immunoglobulin-like domain III of the receptor. *Hum Genet* 1998; **102(2)**: 145-150.
- S3. Oldridge M, Wilkie AO, Slaney SF *et al*: Mutations in the third immunoglobulin domain of the fibroblast growth factor receptor-2 gene in Crouzon syndrome. *Hum Mol Genet*. 1995; **4(6)**: 1077-1082.
- S4. Park WJ, Meyers GA, Li X *et al*: Novel FGFR2 mutations in Crouzon and Jackson-Weiss syndromes show allelic heterogeneity and phenotypic variability. *Hum Mol Genet*. 1995; **4(7)**: 1229-1233.
- S5. Steinberger D, Collmann H, Schmalenberger B, Müller U: A novel mutation (A886G) in exon 5 of FGFR2 in members of a family with Crouzon phenotype and plagiocephaly. *J Med Genet* 1997; **34(5)**: 420-422.
- S6. Stenirri S, Restagno G, Ferrero GB *et al*: Integrated strategy for fast and automated molecular characterization of genes involved in craniosynostosis. *Clin Chem* 2007; **53(10)**: 1767-1774.
- S7. Meyers GA, Day D, Goldberg R *et al*: FGFR2 exon IIIa and IIIc mutations in Crouzon, Jackson-Weiss, and Pfeiffer syndromes: evidence for missense changes, insertions, and a deletion due to alternative RNA splicing. *Am J Hum Genet* 1996; **58(3)**: 491-498.

- S8. Reardon W, Winter RM, Rutland P, Pulleyn LJ, Jones BM, Malcolm S: Mutations in the fibroblast growth factor receptor 2 gene cause Crouzon syndrome. *Nat Genet* 1994; **8**: 98-103.
- S9. Steinberger D, Mulliken JB, Müller U: Predisposition for cysteine substitutions in the immunoglobulin-like chain of FGFR2 in Crouzon síndrome. *Hum Genet* 1995; **96**: 113-115.
- S10. Lajeunie E, Heuertz S, El Ghouzzi V *et al*: Mutation screening in patients with syndromic craniosinostoses indicates that a limited number of recurrent FGFR2 mutations accounts for severe forms of Pfeiffer syndrome. *Eur J Hum Genet* 2006; **14**: 289-298.
- S11. Passos-Bueno MR, Sertié AL, Richieri-Costa A *et al*: Description of a new mutation and characterization of FGFR1, FGFR2, and FGFR3 mutations among Brazilian patients with syndromic craniosynostoses. *Am J Med Genet* 1998; **78**: 237-241
- S12. Pulleyn L.J, Reardon W, Wilkes D *et al*: Spectrum of craniosynostosis phenotypes associated with novel mutations at the fibroblast growth factor receptor 2 locus. *Eur J Hum Genet*. 1996; **4**: 283-291.
- S13. Wilkie AOM, Slaney SF, Oldridge M *et al*: Apert syndrome results from localized mutations of FGFR2 and is allelic with Crouzon syndrome. *Nat Genet* 1995; **9**: 165-172.
- S14. Tartaglia M, Di Rocco C, Lajeunie E, Valeri S, Velardi F, Battaglia PA: Jackson-Weiss syndrome. Identification of two novel FGFR2 missense mutations shared with Crouzon and Pfeiffer craniosynostotic disorders. *Hum Genet*. 1997; **101**: 47-50.
- S15. Tsukuno M, Suzuki H, Eto Y: Pfeiffer syndrome caused by haploinsufficient mutation of FGFR2. *J Craniofac Genet Dev Biol* 1999; **19**: 183-188.

- S16. Roscioli T, Elakis G, Cox TC, Moon DJ, Venselaar H, Turner AM, Le T, Hackett E, Haan E, Colley A, Mowat D, Worgan L, Kirk EP, Sachdev R, Thompson E, Gabbett M, McGaughran J, Gibson K, Gattas M, Freckmann ML, Dixon J, Hoefsloot L, Field M, Hackett A, Kamien B, Edwards M, Adès LC, Collins FA, Wilson MJ, Savarirayan R, Tan TY, Amor DJ, McGillivray G, White SM, Glass IA, David DJ, Anderson PJ, Gianoutsos M, Buckley MF. Genotype and clinical care correlations in craniosynostosis: findings from a cohort of 630 Australian and New Zealand patients. *Am J Med Genet C Semin Med Genet.* 2013;**163C(4)**: 259-270.
- S17. Cornejo-Roldan LR, Roessler E, Muenke M: Analysis of the mutational spectrum of the FGFR2 gene in Pfeiffer syndrome. *Hum Genet* 1999; **104**: 425-431.
- S18. Rutland P, Pulleyn LJ, Reardon W *et al*: Identical mutations in the FGFR2 gene cause both Pfeiffer and Crouzon syndrome phenotypes. *Nat Genet* 1995; **9**: 173-176.
- S19. Paznekas WA, Cunningham ML, Howard TD *et al*: Genetic heterogeneity of Saethre-Chotzen syndrome, due to TWIST and FGFR mutations. *Am J Hum Genet* 1998; **62**: 1370-1380.
- S20. Wilkie AO, Bochukova EG, Hansen RM *et al*: Clinical dividends from the molecular genetic diagnosis of craniosynostosis. *Am J Med Genet* 2007; **143A**: 1941-1949.
- S21. El Ghouzzi V, Le Merrer M, Perrin-Schmitt F *et al*: Mutations of the TWIST gene in the Saethre-Chotzen syndrome. *Nat Genet* 1997; **15**: 42-46.
- S22. Meyers GA, Orlow SJ, Munro IR, Przylepa KA, Jabs EW: Fibroblast growth factor receptor 3 (FGFR3) transmembrane mutation in Crouzon syndrome with acanthosis nigricans. *Nat Genet* 1995; **11**: 462-464.

- S23. Przylepa KA, Paznekas W, Zhang M *et al*: Fibroblast growth factor receptor 2 mutations in Beare-Stevenson cutis gyrate syndrome. *Nat Genet* 1996; **13**: 492-494.
- S24. Twigg SR, Matsumoto K, Kidd AM *et al*: The Origin of *EFNB1* Mutations in Craniofrontonasal Syndrome: Frequent Somatic Mosaicism and Explanation of the Paucity of Carrier Males. *Am J Hum Genet*. 2006; **78(6)**: 999-1010.
- S25. Johnson D, Horsley SW, Moloney DM *et al*: A comprehensive screen for TWIST mutations in patients with craniosynostosis identifies a new microdeletion syndrome of chromosome band 7p21.1. *Am J Hum Genet* 1998; **63**: 1282-1293.
- S26. Wieland I, Weidner C, Ciccone R *et al*: Contiguous gene deletions involving EFNB1, OPHN1, PJA1 and EDA in patients with craniofrontonasal syndrome. *Clin Genet* 2007; **72(6)**: 506-516.
- S27. Barroso E, Pérez-Carrizosa V, García-Recuero I *et al*: Mild isolated craniosynostosis due to a novel FGFR3 mutation, p.A334T. *Am J Med Genet* 2011; **155A**: 3050-3053.
